# Supplementary material
Source: publisher figshare collection journal article supplement (https://sage.figshare.com/ndownloader/files/14144882)
Supplement: Supplementary file 1 [file 14144882]

**a**

□ mangrove present in 1989

**Appearances**

- 1991-1996
- 1996-2000
- 2000-2006
- 2006-2010
- 2010-2016

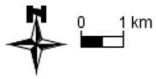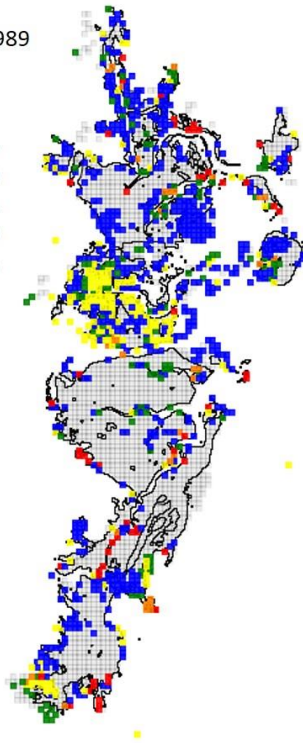

**b**

□ mangrove present in 2016

**Disappearances**

- 1991-1996
- 1996-2000
- 2000-2006
- 2006-2010
- 2010-2016

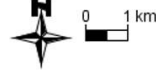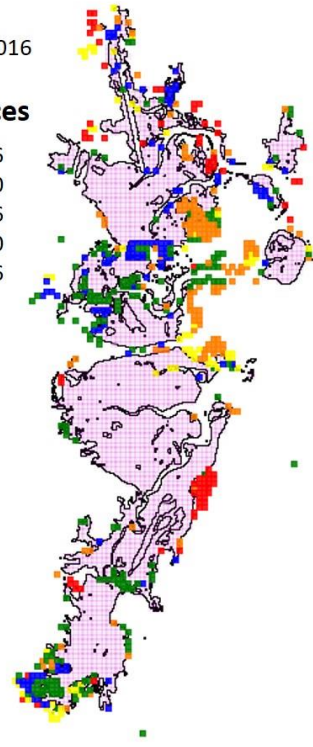

Appendix 4: Maps of the mangrove areas that a) appears and b) disappears for each period in Suape.
